# Supplementary material for: The RECAP Test Rapidly and Reliably Identifies Homologous Recombination-Deficient Ovarian Carcinomas
Source: Cancers (Basel). 2020 Sep 29;12(10):2805. doi: 10.3390/cancers12102805 (PMC7650677; doi:10.3390/cancers12102805)
Supplement: Supplementary file 1 [file cancers-12-02805-s001.zip › cancers-930804-supplementary tables.xlsx]

## Sheet: Supplementary Table S1
Supplementary Table S1. Identification of HR-deficient tumors by functional and genomic analyses.
HR test	Article	Year	Trial	Type of analyses	Patient cohort	Sample type	Number of samples/patients	Output	Therapy response in patients
Functional assay RAD51 foci formation	Mukhopadhyay, A., et al	2010		N.A	EOC, enriched for advanced stage and high-grade EOCs	Ascitis	25	64% (n=16) HRD	N.A.
	Mukhopadhyay, A., et al	2012		BRCA1 IHC	EOC stage II/IV, PPC	Ascitis	50	52% (n=26) HRD, from which 35% (8/23) negative for BRCA1 staining	HRD associated to platinum sensitivity and an increased PFI
	Patterson, M.J., et al	2014		N.A.	EOC, not selected	malignant pleural effusions	4	0% HRD	N.A.
	Shah, M.M., et al	2014		N.A.	OC	Human ovarian carcinoma cell lines, pre-selected	4 cell lines	25% (n=1) HRD cell lines(A2780ip2) with BRCAness profile, harbouring PTEN mutation	N.A.
						PDX from naïve omental tumor nodules	8 PDX lines	38% (n=3) HRD PDX lines	N.A.
	Tumiati, M., et al	2018		WGS/WES/Targeted WES	HGSOC	Dissociated tumor cells and ascites	21	29% (n=6) HRD, one tumor with BRCA1 pathogenic variant	HRD associated to platinum sensitivity, good response to primary therapy and improved OS
				LOH				No strong correlation between LOH and HRD
Genomic scars/mutational signatures	Abkevich, V., et al	2012		Genome-wide LOH	EOC, not selected	Snap-frozen tissue samples	640 (total of three cohorts)	33% (211/640) HRD tumors based on pathogenic variants in BRCA1 and/or BRCA2, BRCA1 methylation or low expression of BRCA1/2	HRD scores associated to improved PFS and OS in one patient cohort (n=435)
				BRCA1/BRCA2 NGS				Number of long LOH regions was significantly higher in BRCA1/2 deficient tumors
				RAD51C promoter methylation				HRD scores were significantly higher among samples with RAD51C promoter methylation
	Wang, Z.C., et al	2012		Genome-wide LOH and AI	HGSOC, grade 2 or 3	Snap-frozen tissue samples	47	62% (29/47) tumors had high levels of LOH/AI	Patients with high level LOH/AI showed a longer PFS
				BRCA1 promoter methylation				20% (9/44) with BRCA1 promoter methylation	Patients with BRCA1 promoter hypermethylation had similar survival characteristics to patients without defects in BRCA
	Birkbak, N.J., et al	2013		Total number of exome mutations (TCGA)	HGSOC, unselected	Snap-frozen tissue samples	316	11% (34/316) were mBRCA with high Nmut	High whole-exome mutation burden (Nmut) in tumors with BRCA pathogenic variants associated to improved PFS and OS
				gBRCA1/BRCA2 or tBRCA1/2 (TCGA)				22% (n=70) mBRCA
	Lu, J., et al	2014		Gene expression of 116 genes	HGSOC, stage III or IV	TCGA database	308	52% (159/308) were HRD	HRD scores were associated to longer PFS and improved OS
	Pennington, K.P., et al	2014		NGS for HR gene panel	EOC, PFTC or PPC, partially selected	Snap-frozen or FFPE tissue samples	390	31% (121/390) had a mutation in one or more of 13 HR-related genes	Patients with mutations in HR-related genes had a better response to primary platinum chemotherapy and improved OS than patients without mutiations in HR-related genes.
	Ruscito, I., et al	2014		BRCA1 promoter methylation	HGSOC, unselected	Snap-frozen tissue samples	257	15% (38/257) tumors with BRCA1 promoter methylation	No impact on PFS and OS rates.
	Konstantinopolous, P.A.	2015		Gene expression of 116 genes	HGSOC, stage II till IV	TCGA database	489	20% tumors with BRCA1/2 somatic or germline pathogenic variant
								6% tumors with pathogenic variants in HR-related genes
				BRCA1 and RAD51C promoter methylation				10% tumors with BRCA1 promoter methylation, 2% with RAD51C promoter methylation
	Mirza, M.R., et al	2016	ENGOT-OV16/NOVA	HRD Myriad score (LOH, TAI and LST)	EOC, platinum-sensitive, selected	FFPE tissue sections	296	55% (162/296) HRD tumors, from which 29% (47/162) with a BRCA pathogenic variant	Clinical benefit was observed in both HRD and HRP groups. HRD status was not sufficiently precise to predict Niraparib sensitivity.
	Coleman, R.L., et al	2017	ARIEL3	BRCA1/BRCA2 NGS and LOH	HGSOC, OEC, PFTC or PPC, platinum-sensitive, selected	FFPE tissue sections	354	63% (354/564) HRD tumors, based on presence of BRCA pathogenic variant or LOH.	BRCAwt patients with high genomic LOH showed increased PFS compared to BRCAwt with low genomic LOH after rucaparib treatment. However, HRD status was not sufficiently precise to predict Rucaparib sensitivity.
	Swisher, E.M., et al	2017	ARIEL2	BRCA1/BRCA2 NGS and LOH	HGSOC, recurrent, platinum-sensitive		192	21% (40/192) patients had a BRCA pathogenic variant	PFS was longer in the subgroups with BRCA pathogenic variants and LOH high compared to the LOH low subgroup after treatment with rucaparib.
								43% (82/192) patients had a LOH high score
	Domcheck, S.M. et al	2017	Study 42, NCT01078662	BRCA1/BRCA2 NGS	gBRCA1/2 EOC patients	FFPE tissue sections	154	All patients had a gBRCA pathogenic variant.	Notable antitumor activity in patients with gBRCA1/2m advanced ovarian cancer to olaparib treatment.
	Stronach, E.A., et al	2018	SCOTROC4	HRD score (LOH, TAI and LST)	EOC stage IC to IV, PFTC or PPC	FFPE tissue sections	250	30% (n=74) HRD tumors, from which 14% (n=34) with somatic BRCA pathogenic variant	HRD score and BRCA pathogenic variants significantly associated to CA125 complete response after carboplatin treatment.
								36% (n=64) HRD HGSOC only, from which 16% (n=29) with BRCA pathogenic variants
	Hodgson, D.R., et al	2018		NGS for HR gene panel	Relapsed serous OC, grade 2 or 3 with platinum sensitivity	Blood samples and FFPE tissue sections	209	53% (111/209) tumors harboured BRCA1/2 pathogenic variant	Patients with BRCA pathogenic variants gained most benefit from olaparib.
			Study 19, D0810C00019; NCT00753545	BRCA1 promoter methylation				10% (21/209) tumors were wtBRCA, but harboured pathogenic variants in at least one HR-related gene	21/95 patients with BRCAwt, but pathogenic variants in HR-related genes gained similar benefits from olaparib as patients with BRCA pathogenic variants.
				HRD Myriad score (LOH, TAI and LST)				70% (139/199) obtained a Myriad HRD score, 73% (101/139) of these patients harboured a BRCA pathogenic variant	wtBRCA patients with HRD status were only marginally more likely to benefit from olaparib.
	Tsibulak, I., et al	2018		BRCA1/2 mRNA-expression levels	EOC, primary debulking, unselected	Snap-frozen tissue samples	201	18% (36/201) tumors harboured a BRCA1 pathogenic variant, 6% (11/201) harboured a BRCA2 pathogenic variant	Low BRCA1 levels were associated to an improved OS.
				Targeted NGS using the TruSight Cancer sequencing panel					Low BRCA2 levels were associated to an improved OS and longer PFS.
				BRCA1 promoter methylation				11% (21/199) tumors with BRCA1 promoter methylation
	González‑Martín, A. et al	2019	PRIMA/ENGOTOV26/GOG-3012	HRD Myriad score (LOH, TAI and LST)	Newly diagnosed, platinum-sensitive, HGSOC or endometrioid grade III or IV, selected	FFPE tissue sections	733	373 (50.9%) patient had an HRD score, 223 (30.4%) of these patients had pathogenic variants in BRCA1/2	Among the patients with an HRD score, the PFS was significantly longer in the niraparib treated group than in the placebo group. This correlation was also observed in the whole patient cohort and not restricted to patients with an HRD score.
Abbreviations: HRD = homologous recombination deficient; EOC = epithelial ovarian carcinoma; HGSOC = High grade serous ovarian carcinoma; PPC = primary peritoneal carcinoma; OEC = ovarian endometrioid carcinoma; PFTC = primary fallopian tube carcinoma;
PDX = patient-derived xenograft; CNV = copy number variation; AI = allelic imbalance; wt = wildtype; PFI = progression free interval; PFS = progression free survival.

## Sheet: Supplementary Table S2
Supplementary Table S2. Estimated workload of BRCA next-generation sequencing gene panel testing versus the RECAP test.
	BRCA NGS/HR gene panel					RECAP test
Process	Activity	Hands-on time per sample	Hands-on time per full run (50 samples)	Complete time per sample	Complete time per full run (50 samples)	Process	Activity	Hands-on time per sample	Hands-on time per full run (25 samples)	Complete time per sample	Complete time per full run (25 samples)
General	Tissue embedding	10 min	90 min	10 min	90 min	General	Tissue embedding	10 min	45 min	10 min	45 min
	H&E slicing	10 min	120 min	10 min	120 min		Paraffin cube slicing	10 min	60 min	10 min	60 min
	H&E staining (machine)	10 min	10 min	30 min	30 min	Quality assessment	H&E staining (machine)	10 min	10 min	10 min	10 min
	Pathologist H&E review (mark tumor area)	5 min	90 min	5 min	90 min		yH2AX IHC staining	150 min	150 min	1338 min	1338 min
DNA isolation	DNA punch or microdissection	10 min	120 min	10 min	120 min		p53 IHC staining	150 min	150 min	1338 min	1338 min
	DNA isolation (machine, using Tissue Preparation System)	30 min	45 min	240 min	240 min		Pathologist H&E, γH2AX and P53 review (5 min per slide)	15 min	135 min	15 min	135 min
	DNA concentration determination	10 min	90 min	10 min	90 min	RECAP	Slicing tumor tissue	10 min	250 min	10 min	250 min
	DNA quality determination (qPCR)	5 min	10 min	210 min	300 min		Preparation culture system	15 min	30 min	15 min	30 min
NGS	Dilute samples	10 min	90 min	10 min	90 min		Cryopreservation tissue	20 min	60 min	20 min	60 min
	DNA repair	5 min	10 min	20 min	30 min		Irradiation	2 min	18 min	10 min	90 min
	Library preparation (amplification, digestion, ligation)	45 min	90 min	300 min	300 min		Tissue fixation	10 min	60 min	10 min	60 min
	Library purification and normalisation	20 min	60 min	240 min	240 min		RAD51/geminin IF staining	150 min	150 min	378 min	378 min
	Ion S5 CHEF	30 min	30 min	480 min	480 min		IF slide scoring	15 min	375 min	15 min	375 min
	S5 sequencing	10 min	10 min	180 min	180 min
Data analysis	Pipeline	NA	NA	960 min (o/n)	960 min (o/n)
	Quality control	5 min	180 min	5 min	180 min
	Analysis	30 min	1200 min	30 min	1200 min
Total	2-3 weeks for full run	4h 5 min	37h 25min	45h 50 min	79h	Total	2 weeks for full run	9h 27 min	24h 53 min	53h	69h 29 min
The workload for both the BRCA NGS gene panel and the RECAP test are estimations based on working procedures in the Leiden University Medical Center (LUMC), Leiden, the Netherlands.
Abbreviations: NGS = next-generation sequencing; RECAP = Recombination CAPacity; IF = immunofluorescence; min = minutes; h = hours; H&E = Hematoxylin and Eosin; NA= Not Applicable; o/n= overnight.

## Sheet: Supplementary Table S3
Supplementary Table S3. Estimated cost prices for a BRCA next-generation sequencing gene panel versus the RECAP test.
	BRCA NGS/HR gene panel				RECAP test
Subject	Product	Costs per sample	Costs per full run (50 samples)	Costs per sample in full run	Subject	Product	Costs per sample	Costs per full run (25 samples)	Costs per sample in full run
General	Paraffin cube (embedding, cassette, foams)	3	150	3	General	Paraffin cube (embedding, cassette, foams)	3	75	3
	Glassware (microscope slides, coverslips)	0.3	15	0.3		Buffers (antigen retrieval, washbuffers, formalin)	7.5	7.5	0.3
	H&E machinal costs	0.11	5.5	0.11		Disposables (pipet tips, wells-plate, falcon tubes)	0.2	5	0.2
	Disposables (pipet tips, wells-plate, falcon tubes)	0.2	10	0.2		Glassware (microscope slides, coverslips)	0.3	7.5	0.3
DNA isolation	VERSANT Tissue Preparation Reagents Kit	5.2	260	5.2	Quality assessment	H&E machinal costs	0.11	2.75	0.11
	Qubit™ dsDNA HS Assay Kit	0.79	39.33	0.79		Primary antibodies (γH2AX and p53)	0.05	1.25	0.05
	Components of qPCR mix	0.5	25	0.5		Secondary antibodies (DAB+ substrate chromogen system)	1	25	1
	Uracil-DNA Glycosylase	0.28	13.92	0.28		Mounting medium (Surgipath Micromount)	0.5	12.5	0.5
	Ion AmpliSeq™ Library Kit 2.0	70.69	3534.41	70.69	RECAP	OSE medium	0.25	6.25	0.25
	Ion Library TaqMan™ Quantitation Kit	7.04	352.11	7.04		DNAse	0.76	18.88	0.76
	Ion 540™ Chip Kit	1135.89	1135.89	22.72		Primary antibodies (RAD51 and geminin)	1.8	45	1.8
	Ion 540™ Kit-Chef (2 sequencing runs per initialization)	615.59	615.59	12.32		Secondary antibodies (Alexa Fluor 488 and Alexa Fluor 555)	0.1	2.5	0.1
						ProLong Gold Antifade mount with DAPI	1.3	32.5	1.3
Total		1839.59	6156.75	123.15	Total		16.87	241.63	9.67
The total cost prices for both the BRCA NGS gene panel and the RECAP test are indications based on European market prices in August 2020. Abbreviations: NGS = next-generation sequencing; RECAP = Recombination CAPacity; H&E = Hematoxylin and Eosin; Excl = exclusive.

## Sheet: Supplementary Table S4
Supplementary Table S4. Excluded tumor specimens based on tissue quality, p53 status or the RECAP test.
	Sample type	Tumor specimen obtained	Number of patients	Total number of patients (n=21)
Exclusion QC1 tissue quality	Solid tumors	Primary disease	10	10
	Ascites	Primary disease	1	1
		Recurrent disease	1	1
Exclusion QC2 p53 status	Ascites	Primary disease	5	8
		Recurrent disease	3
Exclusion RECAP test	Ascites	Primary disease	1	1
Tumor specimens were obtained during primary disease (primary or interval cytoreductive surgery) or during recurrent disease.
Tumor specimens were subjected to a stringent quality assessment as described in the Materials & Methods.
Abbreviations: QC = quality control; RECAP = REcombination CAPacity.

## Sheet: Supplementary Table S5
Supplementary Table S5. Pathogenic variants in BRCA1 and BRCA2 identified in HR-deficient ovarian carcinomas.
Case ID	Chromosome: Position	Gene	HGVSCoding	HGVSProtein	Exon/Intron	Pathogenicity	Coverage	Variant Frequency	Type	BRCA1 LOH	BRCA2 LOH
40	17:43048721	BRCA1	NM_007294.3, c.5333-36_5406+400del	p.Asp1778GlyfsTer27	22	Class 5-clinical pathogenic	>1000	Unknown	deletion of exon 22	Yes	Not informative
41	17:41245529	BRCA1	NM_007294.3, c.2019delA	p.Glu673AspfsTer28	10	Class 5-clinical pathogenic	1980	0.919	frame-shift	Yes	Not informative
42	17:41276080	BRCA1	NM_007294.3:c.34C>T	p.Gln12Ter	2	Class 5-clinical pathogenic	1264	0.959	nonsense	Yes	Yes
43	13:32913703	BRCA2	NM_000059.3:c.5213_5216delCTTA	p.Thr1738IlefsTer2	11	Class 5-clinical pathogenic	1988	0.896	frame-shift	Yes	Yes
44	17:41244063	BRCA1	NM_007294.3:c.3485delA	p.Asp1162ValfsTer48	10	Class 5-clinical pathogenic	1987	0.613	frame-shift	Yes	Not informative
45	17:41226438	BRCA1	NM_007294.3:c.4575_4585delAGAGGAGCTCA	p.Gln1525HisfsTer2	14	Class 5-clinical pathogenic	1343	0.881	frame-shift	Yes	Not informative
47	17:41209068	BRCA1	NM_007294.3:c.5277+1G>A	Unknown	Intron	Class 5-clinical pathogenic	1687	0.808	Splice-site	Yes	Yes
Case IDs correspond to case IDs in Figure 3, Supplementary Figures S4 and S5 and Supplementary Table S6. Abbreviations: LOH = Loss Of Heterozygosity.

## Sheet: Supplementary Table S6
Supplementary Table S6. Extended clinicopathological characteristics of the ovarian cohort stratified for homologous recombination repair capacity as determined by the RECAP test.
		RECAP specimen characteristics						Clinical follow-up
	Case ID	Specimen type	Specimen obtained NACT= neoadjuvant chemotherapy	Tumor vitality H&E poor = 1 moderate = 2 good = 3	H&E Tumor % <5% = 0 5-20% = 1 21-50% = 2 >50% = 3	Total tissue quality score (2-6)	RECAP score (%)	Included for analysis NP = no platinum treatment FD = insufficient follow-up data RD = recurrent disease HRI = HR-Intermediate score	Age at diagnosis	Disease history prior to RECAP specimen inclusion	Histologic subtype HS = high-grade serous LS = Low-grade serous M = mucinous ET = endometrioid CC = clear cell	FIGO stage	Neoadjuvant chemotherapy C = Carboplatin P = Paclitaxel	Type of surgery CPS = cytoreductive primary surgery CIS = cytoreductive interval surgery	Residual tumor after surgery (cm)	Adjuvant chemotherapy C = Carboplatin P = Paclitaxel	Chemotherapy courses (total)	Primary therapy outcome CR = complete remission PR= partial remission SD = stable disease PD = progressive disease	Primary platinum response sensitive = no recurrence or recurrence > 6 months after last chemotherapy resistant = recurrence < 6 months after last chemotherapy	Progression after primary therapy or recurrence	Disease Free Survival (EFS) Time between start of treatment and progressive disease (months)	Treatment recurrent or progressive disease C = Carboplatin P = Paclitaxel CX =caelyx	Status last check-up CR = complete remission PR = partial remission SD = stable disease PD = progressive disease	Deceased	Follow-up time Time between start of treatment and last check-up/death (months)
HR-Proficient	1	Solid tumor	Surgical staging	3	2	5	99	No, NP	56	None	M	I	No	Surgical staging	0	N/A	N/A	CR	N/A	No	45.87	N/A	CR	No	45.87
	2	Solid tumor	Cytoreductive interval surgery	2	1	3	98	No, FD	72	None	HS	IV	Yes, C/P	CIS	0	C/P	8	PR	Unknown	Unknown	Unknown	Unknown	PD	Yes	32.17
	3	Ascites	Cytoreductive primary surgery	3	3	6	96	Yes	67	None	HS	IIIC	No	CPS	<1	C/P	6	CR	sensitive	Yes	17.33	C/P	PD	Yes	28.37
	4	Solid tumor	Cytoreductive interval surgery	3	2	5	96	No, NP	30	None	LS	IIIC	Yes, C/P	CIS	<1	N/A	3	PD	resistant	Yes	1.47	CX/Tamoxifen/Letrozol	PD	Yes	19.6
	5	Solid tumor	Surgical staging	3	3	6	95	No, NP	62	None	ET	IA	No	Surgical staging	0	N/A	N/A	CR	N/A	No	43.9	N/A	CR	No	43.9
	6	Solid tumor	Cytoreductive primary surgery	2	2	4	95	Yes	49	None	ET	IIB	No	CPS	0	C/P	6	CR	sensitive	No	49.1	N/A	CR	No	49.1
	7	Solid tumor	Cytoreductive primary surgery	2	3	5	92	Yes	69	None	HS	IIIC	No	CPS	<1	C/P	6	CR	sensitive	Yes	27.97	C/CX	PD	Yes	50
	8	Ascites	Recurrent disease	3	3	6	92	No, RD	64	Ovarian	HS	IIB	No	CPS	<1	C/P	6	CR	sensitive	Yes	19.47	C/P + C/CX	PD	Yes	38.43
	9	Solid tumor	Cytoreductive interval surgery	2	0	2	92	Yes	51	None	HS	IV	Yes, C/P	CIS	0	C/P	6	CR	resistant	Yes	9.07	Tamoxifen	PD	Yes	23.47
	10	Ascites	Before NACT	3	1	4	91	Yes	65	None	HS	IV	Yes, C/P	CIS	<1	C/P	6	PR	resistant	Yes	6.6	C/CX	PD	Yes	8.67
	11	Solid tumor	Surgical staging	2	1	3	91	No, NP	58	None	M	IA	No	Surgical staging	0	N/A	N/A	CR	N/A	No	37	N/A	CR	No	37
	12	Solid tumor	Cytoreductive primary surgery	3	3	6	90	Yes	77	None	HS	IIIC	No	CPS	0	C/P	6	CR	sensitive	No	52.83	N/A	CR	No	52.83
	13	Solid tumor	Cytoreductive primary surgery	3	3	6	88	Yes	59	None	LS	IIIC	No	CPS	<1	C/P	6	CR	sensitive	Yes	12.13	C/B/gemcitabine	PD	No	55.03
	14	Ascites	Before NACT	2	0	2	87	Yes	69	None	HS	IIIC	Yes, C/P	CIS	<1	C/P	6	CR	sensitive	Yes	14.8	C/CX/APR-246	PD	Yes	26.37
	15	Solid tumor	Cytoreductive interval surgery	3	2	5	86	Yes	55	None	HS	IIIC	Yes, C/P	CIS	<1	C/P	6	CR	resistant	Yes	8.53	P/bevacizumab	SD	No	35.27
	16	Solid tumor	Cytoreductive interval surgery	3	3	6	86	Yes	64	None	HS	IIIC	Yes, C/P	CIS	0	C/P	9	CR	resistant	Yes	25.23	C/CX/APR-246	SD	Yes	40.33
	17	Ascites	Recurrent disease	3	0	3	84	No, RD	69	Ovarian	HS	IIIC	Yes, C/P	CIS	0	C/P	6	PR	resistant	Yes	8.2	CX/avelumab	PD	Yes	23.63
	#18	Solid tumor	Cytoreductive primary surgery	1	2	3	82	Yes	71	None	HS	IIIC	No	CPS	>1	C	6	PR	resistant	Yes	7.97	None	PD	Yes	16.73
	19	Solid tumor	Cytoreductive primary surgery	3	3	6	80	Yes	73	None	ET	IIB	No	CPS	0	C	6	CR	sensitive	No	56.2	N/A	CR	No	56.2
	20	Solid tumor	Cytoreductive interval surgery	2	2	4	80	No, FD	48	None	HS	IV	Yes, C/P	CIS	0	C/P	6	Unknown	Unknown	Unknown	Unknown	Unknown	CR	Unknown	4.9
	21	Solid tumor	Cytoreductive primary surgery	2	1	3	79	Yes	79	None	HS	IIIC	No	CPS	<1	C/P	6	CR	resistant	Yes	10.3	Unknown	PD	Yes	26.53
	22	Solid tumor	Recurrent disease	2	3	5	79	No, RD	76	Ovarian	ET	IIB	No	CPS	0	C/P	6	CR	sensitive	Yes	62.7	C/P	PD	Yes	65.17
	23	Ascites	Before NACT	3	2	5	76	Yes	76	None	HS	IIIC	Yes, C	None	N/A	C	2	PD	resistant	Yes	1.2	None	PD	Yes	1.9
	24	Ascites	Recurrent disease	3	2	5	75	No, RD	56	Ovarian	HS	IIIC	No	CPS	<1	C/P	6	CR	sensitive	Yes	38.37	C/CX	PD	Yes	56.2
	25	Solid tumor	Cytoreductive primary surgery	2	1	3	75	Yes	39	None	LS	IIIC	No	CPS	<1	C/P	6	CR	sensitive	Yes	10.3	CX/binimetinib	PD	Yes	33.4
	26	Solid tumor	Cytoreductive interval surgery	3	2	5	74	Yes	58	Breast	HS	IIIC	Yes, C/P	CIS	<1	C/P/bevacizumab	6	CR	sensitive	Yes	16.03	C/P	PD	Yes	30.7
	27	Ascites	Recurrent disease	3	0	3	73	No, RD	53	Ovarian and breast	HS	IIIC	Yes, C/P	CIS	<1	C/P	6	CR	sensitive	Yes	13.47	C/CX/tocilizumab	PD	Yes	25.83
	#28	Ascites	Recurrent disease	3	3	6	72	No, RD	71	Ovarian	HS	IIIC	No	CPS	>1	C	6	PR	resistant	Yes	7.97	None	PD	Yes	16.73
	*29	Solid tumor	Cytoreductive primary surgery	3	3	6	71	Yes	69	None	HS	IIIC	No	CPS	>1	C/P	6	CR	sensitive	Yes	23.43	C	PD	No	33.13
	30	Ascites	Before NACT	3	2	5	65	No, FD	73	None	HS	IIIC	Yes, C/P	CIS	<1	Unknown	Unknown	Unknown	Unknown	Unknown	Unknown	Unknown	PD	Yes	14.6
	31	Ascites	Recurrent disease	3	3	6	64	No, RD	71	Ovarian	HS	IIIC	No	CPS	<1	C/P	6	CR	resistant	Yes	8.73	CX	PD	Yes	29.8
	32	Solid tumor	Cytoreductive primary surgery	2	3	5	62	Yes	74	Breast	HS	IIB	No	CPS	0	C/P	6	CR	sensitive	No	55.07	N/A	CR	No	55.07
	33	Solid tumor	Cytoreductive primary surgery	2	3	5	61	Yes	54	None	CC	IIB	No	CPS	0	C/P	6	CR	sensitive	No	32.43	N/A	CR	No	32.43
	34	Solid tumor	Cytoreductive interval surgery	3	2	5	60	Yes	78	None	HS	IIIC	Yes, C	CIS	0	C	6	CR	sensitive	No	6.03	N/A	CR	No	6.03
	35	Ascites	Recurrent disease	3	0	3	55	No, RD	63	Ovarian	HS	IIIC	Yes, C/P	CIS	0	C/P	6	CR	sensitive	Yes	13.83	C/P/bevacizumab	PD	Yes	28.47
	36	Ascites	Recurrent disease	3	3	6	54	No, RD	73	Ovarian	HS	IIIC	No	CPS	<1	C/P	6	PR	sensitive	Yes	12.03	C/CX	PD	Yes	28.2
	37	Solid tumor	Cytoreductive primary surgery	3	3	6	51	Yes	69	None	HS	IV	No	CPS	<1	C/P	6	PR	sensitive	No	41.87	N/A	PR	No	41.87
HR-Intermediate	38	Solid tumor	Cytoreductive primary surgery	1	2	3	40	No, HRI	83	Basal cell carcinoma and breast	HS	IIIA	No	CPS	0	C/P	3	CR	sensitive	No	14.6	Unknown	CR	No	14.6
	39	Solid tumor	Before NACT	2	2	4	31	No, HRI	70	None	HS	IIIC	Yes, C/P	CIS	0	C/P/avelumab	6	SD	resistant	Yes	6.93	Avelumab	PD	Yes	23.33
HR-Deficient	40	Solid tumor	Cytoreductive interval surgery	3	0	3	17	Yes	55	None	HS	IIIC	Yes, C/P	CIS	0	C/P	6	CR	sensitive	Yes	16.07	C/P/Olaparib	PR	No	59.9
	41	Solid tumor	Cytoreductive interval surgery	2	2	4	16	Yes	71	Breast	HS	IV	Yes, C/P	CIS	>1	C/P	4	PD	resistant	Yes	4.47	None	PD	Yes	7.5
	42	Solid tumor	Cytoreductive primary surgery	3	3	6	15	Yes	48	None	HS	IIIC	No	CPS	>1	C/P	6	CR	sensitive	No	70.97	N/A	CR	No	70.97
	43	Solid tumor	Cytoreductive primary surgery	2	0	2	15	Yes	66	None	HS	IV	No	CPS	0	C/P	6	CR	sensitive	Yes	19.4	None	CR	No	70.3
	44	Solid tumor	Before NACT	3	3	6	5	No, FD	57	None	HS	IIIC	Yes, C/P	CIS	0	C/P	6	Unknown	Unknown	Yes	Unknown	Unknown	PD	Yes	18.27
	45	Ascites	Before NACT	3	0	3	5	Yes	55	None	HS	IIIC	Yes, C/P	CIS	0	C/P	6	CR	sensitive	Yes	15.07	Dexamethason	PD	Yes	36.6
	46	Ascites	Recurrent disease	3	0	3	4	No, RD	65	Ovarian	HS	IIIC	No	CPS	0	C/P	6	CR	resistant	Yes	9.73	C/P/bevacizumab	PD	Yes	21.57
	47	Solid tumor	Cytoreductive primary surgery	2	1	3	3	Yes	44	Breast	HS	IIIC	No	CPS	<1	C/P	6	CR	sensitive	Yes	28.17	C/P	CR	No	81.3
	48	Ascites	Before NACT	3	0	3	1	Yes	39	None	HS	IIIC	Yes, C/P	CIS	0	C/P	7	CR	sensitive	No	52.53	N/A	CR	No	52.53
	49	Solid tumor	Cytoreductive primary surgery	2	3	5	1	Yes	59	Breast	HS	IC	No	CPS	0	C/P	6	CR	sensitive	No	39.07	N/A	CR	No	39.07
Case IDs correspond to case IDs in Figure 2, Supplementary Figures S1, S3 and SupplementaryTable S5. Abbreviations: N/A = not applicable; # = same patient; * = this patient received NACT with cytoreductive surgery (0 cm tumor residue) 3 months after primary cytoreductive surgery.
